# Supplementary material
Source: PubMed Central journal article supplement (PMC6551992)
Supplement: Supp_Data.pdf [file Supp_Data.pdf]

## Supplementary Data

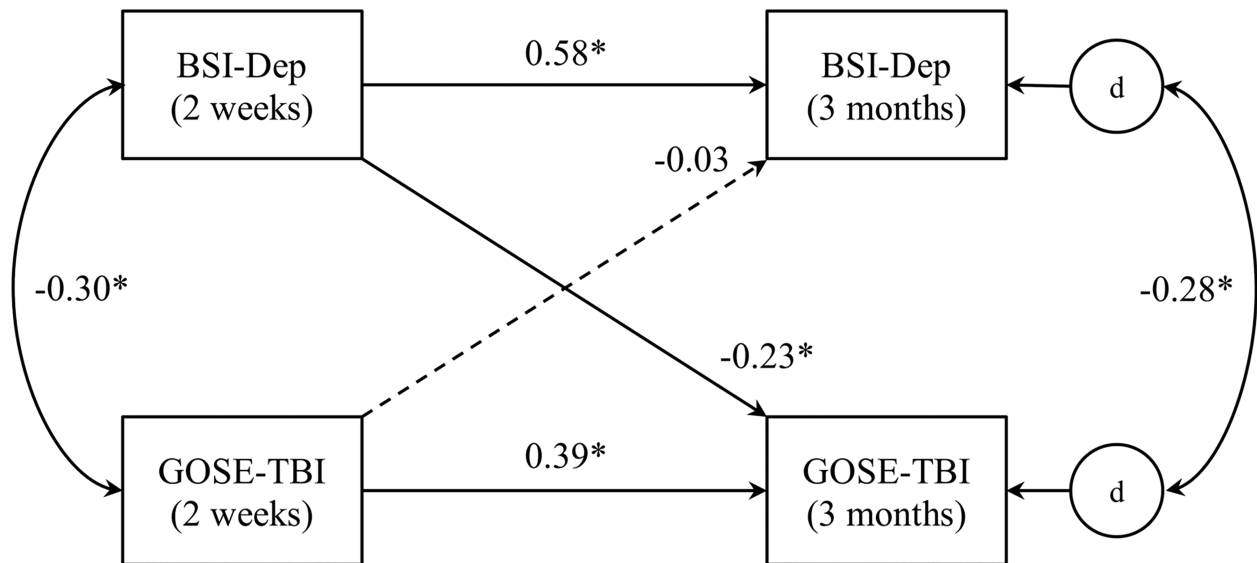

**SUPPLEMENTARY FIG. S1.** Cross-lagged panel analysis model for depression and functional status (CT-negative mTBIs). Note: “BSI-dep” = BSI depression subscale, “d” represents the unique error (“disturbance”) term corresponding to its respective dependent variable. Curved lines represent correlations; straight lines represent predictive paths. Correlation and standardized path coefficients are displayed. Statistically significant effects are presented in solid lines; dashed lines indicate nonsignificant effects. Age, sex, and psychiatric history were also included in the model as covariates, but, for clarity purposes, are not pictured here. \* $p < 0.001$ . BSI, Brief Symptom Inventory; CT, computed tomography; mTBIs, mild traumatic brain injuries.

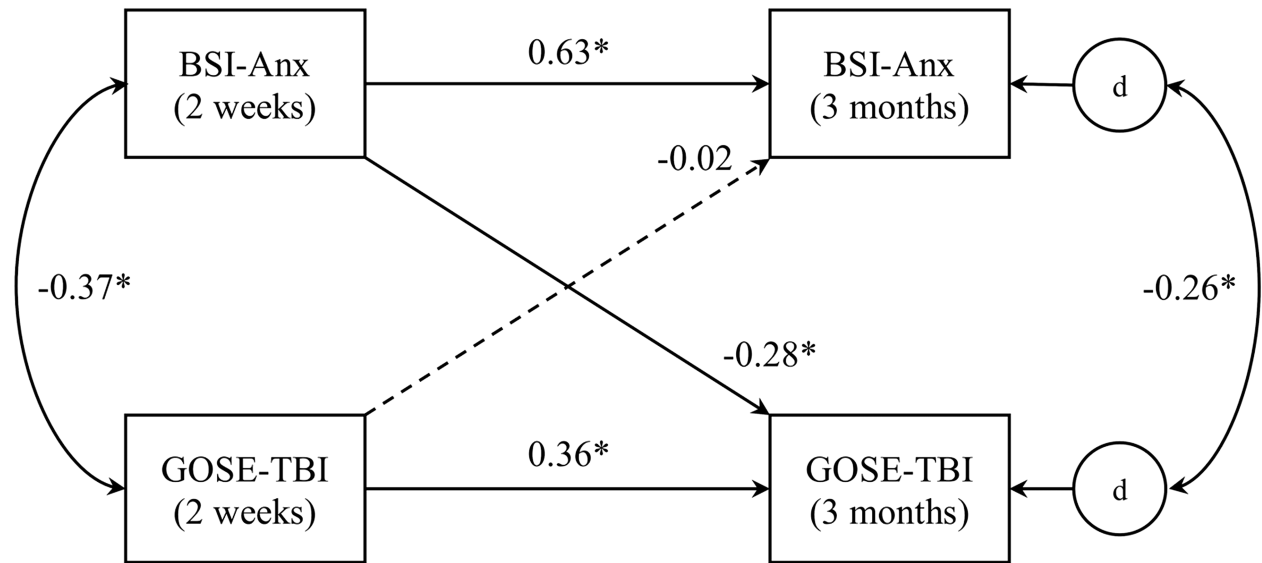

**SUPPLEMENTARY FIG. S2.** Cross-lagged panel analysis model for anxiety and functional status (CT-negative mTBIs). Note: “BSI-anx” = BSI anxiety subscale, “d” represents the unique error (“disturbance”) term corresponding to its respective dependent variable. Curved lines represent correlations; straight lines represent predictive paths. Correlation and standardized path coefficients are displayed. Statistically significant effects are presented in solid lines; dashed lines indicate nonsignificant effects. Age, sex, and psychiatric history were also included in the model as covariates, but, for clarity purposes, are not pictured here.  $*p < 0.001$ . BSI, Brief Symptom Inventory; CT, computed tomography; mTBIs, mild traumatic brain injuries.

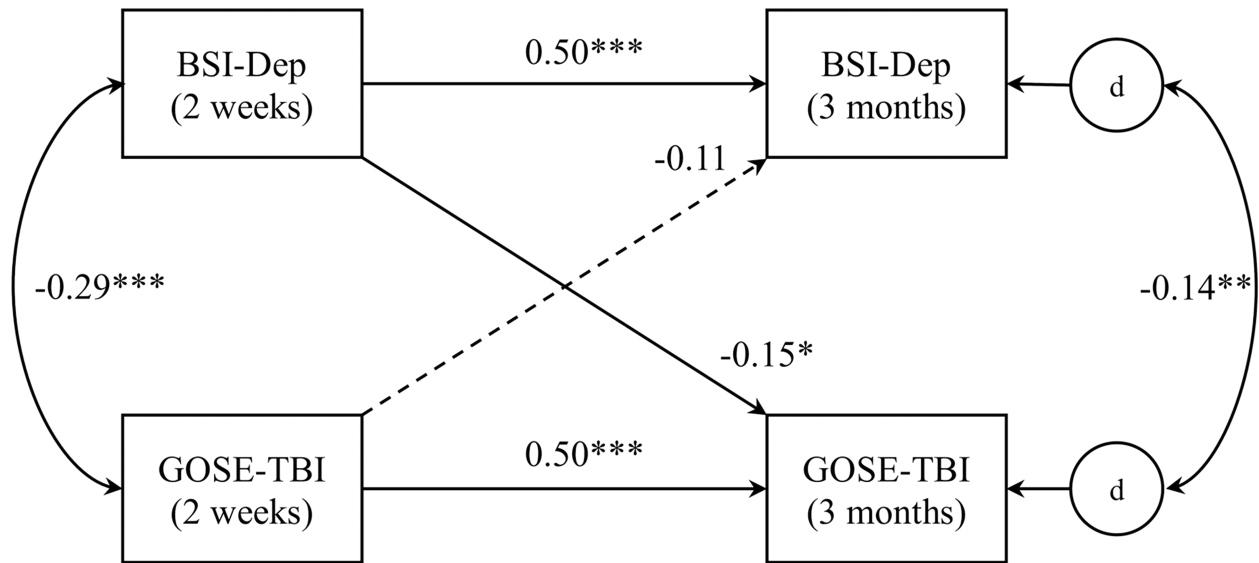

**SUPPLEMENTARY FIG. S3.** Cross-lagged panel analysis model for depression and functional status (CT-positive mTBIs). Note: “BSI-dep” = BSI depression subscale, “d” represents the unique error (“disturbance”) term corresponding to its respective dependent variable. Curved lines represent correlations; straight lines represent predictive paths. Correlation and standardized path coefficients are displayed. Statistically significant effects are presented in solid lines; dashed lines indicate nonsignificant effects. Age, sex, and psychiatric history were also included in the model as covariates, but, for clarity purposes, are not pictured here. \* $p < 0.05$ ; \*\* $p < 0.01$ ; \*\*\* $p < .001$ . BSI, Brief Symptom Inventory; CT, computed tomography; mTBIs, mild traumatic brain injuries.

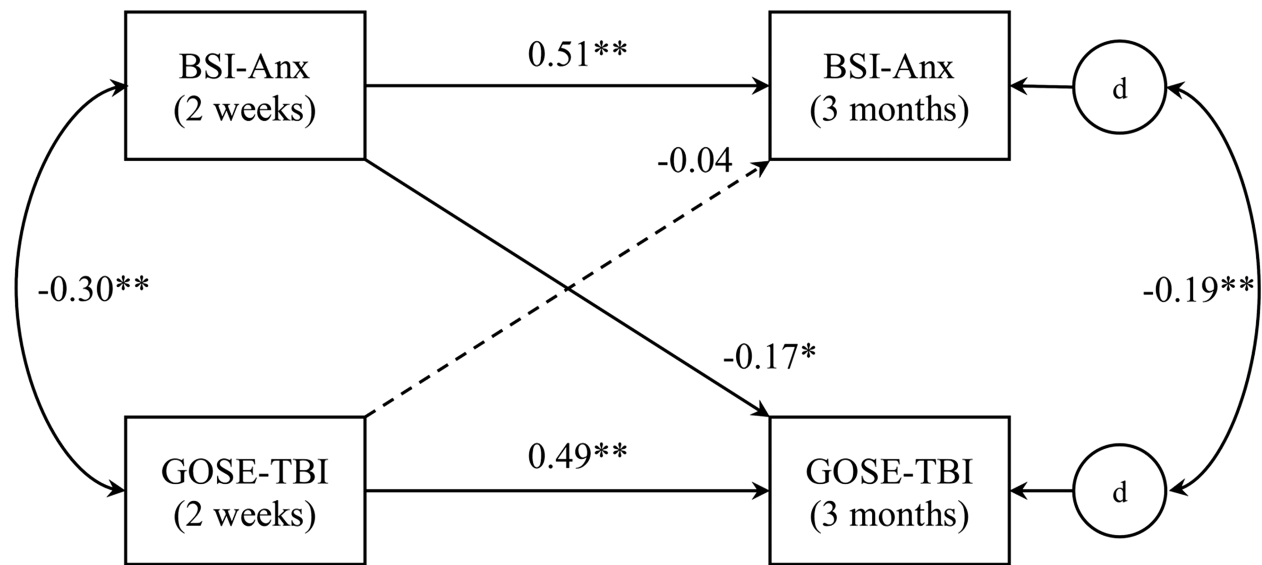

**SUPPLEMENTARY FIG. S4.** Cross-lagged panel analysis model for anxiety and functional status (CT-positive mTBIs). Note: “BSI-anx” = BSI anxiety subscale, “d” represents the unique error (“disturbance”) term corresponding to its respective dependent variable. Curved lines represent correlations; straight lines represent predictive paths. Correlation and standardized path coefficients are displayed. Statistically significant effects are presented in solid lines; dashed lines indicate nonsignificant effects. Age, sex, and psychiatric history were also included in the model as covariates, but, for clarity purposes, are not pictured here. \* $p < 0.01$ ; \*\* $p < 0.001$ . BSI, Brief Symptom Inventory; CT, computed tomography; mTBIs, mild traumatic brain injuries.

SUPPLEMENTARY TABLE S1. INCLUSION/EXCLUSION CRITERIA

| <i>Criterion</i>                                                                                                                                                                                                                                                                                 | <i>Data Source</i> | <i>Comments</i>                                                                                                                                      |
|--------------------------------------------------------------------------------------------------------------------------------------------------------------------------------------------------------------------------------------------------------------------------------------------------|--------------------|------------------------------------------------------------------------------------------------------------------------------------------------------|
| <b>Inclusion criteria</b>                                                                                                                                                                                                                                                                        |                    |                                                                                                                                                      |
| 1. Age 0–100                                                                                                                                                                                                                                                                                     | Chart              |                                                                                                                                                      |
| 2. Documented/verified TBI (ACRM Criteria)                                                                                                                                                                                                                                                       | Chart, interview   |                                                                                                                                                      |
| 3. Injury occurred <24 h ago                                                                                                                                                                                                                                                                     | Chart, interview   |                                                                                                                                                      |
| 4. Acute brain CT for clinical care                                                                                                                                                                                                                                                              | Chart              | Subject must have brain CT scan                                                                                                                      |
| 5. Visual acuity/hearing adequate for testing                                                                                                                                                                                                                                                    | Chart, interview   |                                                                                                                                                      |
| 6. Fluency in English or Spanish                                                                                                                                                                                                                                                                 | Chart, interview   | Based on test battery or personnel availability                                                                                                      |
| 7. Ability to provide informed consent                                                                                                                                                                                                                                                           | Interview          | <input type="checkbox"/> Patient <input type="checkbox"/> Surrogate <input type="checkbox"/> Waiver                                                  |
| <b>Exclusion criteria</b>                                                                                                                                                                                                                                                                        |                    |                                                                                                                                                      |
| 1. Significant polytrauma that would interfere with follow-up and outcome assessment                                                                                                                                                                                                             | Chart              | Significant body trauma may confound TBI outcomes testing.                                                                                           |
| 2. Prisoners or patients in custody                                                                                                                                                                                                                                                              | Chart, interview   |                                                                                                                                                      |
| 3. Pregnancy in female subjects                                                                                                                                                                                                                                                                  | Chart, interview   |                                                                                                                                                      |
| 4. Patients on psychiatric hold (e.g., 5150, 5250)                                                                                                                                                                                                                                               | Chart              |                                                                                                                                                      |
| 5. Major debilitating baseline mental health disorders (e.g., schizophrenia or bipolar disorder) that would interfere with follow-up and the validity of outcome assessment                                                                                                                      | Chart, interview   | Debilitating psychiatric disorders can significantly impact the reliability of follow up and/or pose difficulties in attributing to index TBI.       |
| 6. Major debilitating neurological disease (e.g., stroke, CVA, dementia, or tumor) impairing baseline awareness, cognition, or validity of follow-up and outcome assessment.                                                                                                                     | Chart, interview   | Documented debilitating baseline cognitive impairment will confound outcome assessment in addition to not being fully consentable.                   |
| 7. Significant history of pre-existing conditions that would interfere with follow-up and outcome assessment (e.g., substance abuse, alcoholism, HIV/AIDS, major transmittable diseases that may interfere with consent, end-stage cancers, learning disabilities, and developmental disorders). | Chart, interview   |                                                                                                                                                      |
| 8. Contraindications to MRI (for CA+MR/CA+MRI-HDFT cohort)                                                                                                                                                                                                                                       | MRI screening      |                                                                                                                                                      |
| 9. Low likelihood of follow-up (e.g., participant or family indicating low interest, residence in another state or country, homelessness, or lack of reliable contacts                                                                                                                           | Interview          |                                                                                                                                                      |
| 10. Current participant in an interventional trial (e.g., drug, device, and behavioral)                                                                                                                                                                                                          | Chart, interview   | Exception to co-enrollment exclusion is made for sites participating in Resuscitation Outcomes Consortium Prehospital Tranexamic Acid for TBI Study. |
| 11. Penetrating TBI                                                                                                                                                                                                                                                                              | Chart              |                                                                                                                                                      |
| 12. Spinal cord injury with ASIA score of C or worse                                                                                                                                                                                                                                             | Chart              |                                                                                                                                                      |

TBI, traumatic brain injury; ACRM, American Congress of Rehabilitation Medicine; CT, computed tomography; CVA, cerebrovascular accident; HIV, human immunodeficiency virus; AIDS, acquired immune deficiency syndrome; MRI, magnetic resonance imaging; ASIA, American Spinal Injury Association.
